# Supplementary material
Source: MDPI journal article supplement (https://www.mdpi.com/search?q=inorganics-07-00126)
Supplement: s001 [file inorganics-07-00126-s001.pdf]

# Supplementary Materials: An Optical Power Limiting and Ultrafast Photophysics Investigation of a Series of Multi-Branched Heavy Atom Substituted Fluorene Molecules

Hampus Lundén, Delphine Pitrat, Jean-Christophe Mulatier, Cyrille Monnereau, Iulia Minda, Adrien Liotta, Pavel Chabera, Didrik K. Hopen, Cesar Lopes, Stephane Parola, Tõnu Pullerits, Chantal Andraud and Mikael Lindgren

## Wavelength Scanned Optical Power Limiting (OPL) Measurement, Underlying Data

**Table S1.**  $1/M1$  is the calibration factor of the reference detector from when placing the signal detector at the sample position and doing a linear fit to M1.  $M1/M2$  is the calibration factor of the signal detector from when placing the signal detector at its ordinary position and doing a linear fit to M2. The beam width is the 10%–90% horizontal beam diameter in micrometers.

| Wavelength | M1      | M2      | Beam Width [ $\mu\text{m}$ ] |
|------------|---------|---------|------------------------------|
| 450        | 1, 11   | 1, 009  | 7, 70                        |
| 475        | 0, 76   | 0, 6809 | 8, 10                        |
| 490        | 1, 341  | 1, 218  | 8, 68                        |
| 525        | 0, 6417 | 0, 5864 | 8, 67                        |
| 560        | 1, 552  | 1, 475  | 9, 98                        |
| 575        | 0, 6421 | 0, 59   | 8, 95                        |
| 590        | 1, 091  | 0, 9378 | 9, 29                        |
| 625        | 1, 394  | 1, 312  | 10, 40                       |
| 650        | 0, 9002 | 0, 8413 | 9, 82                        |
| 660        | 1, 527  | 1, 459  | 9, 94                        |
| 700        | 3, 619  | 3, 324  | 9, 24                        |

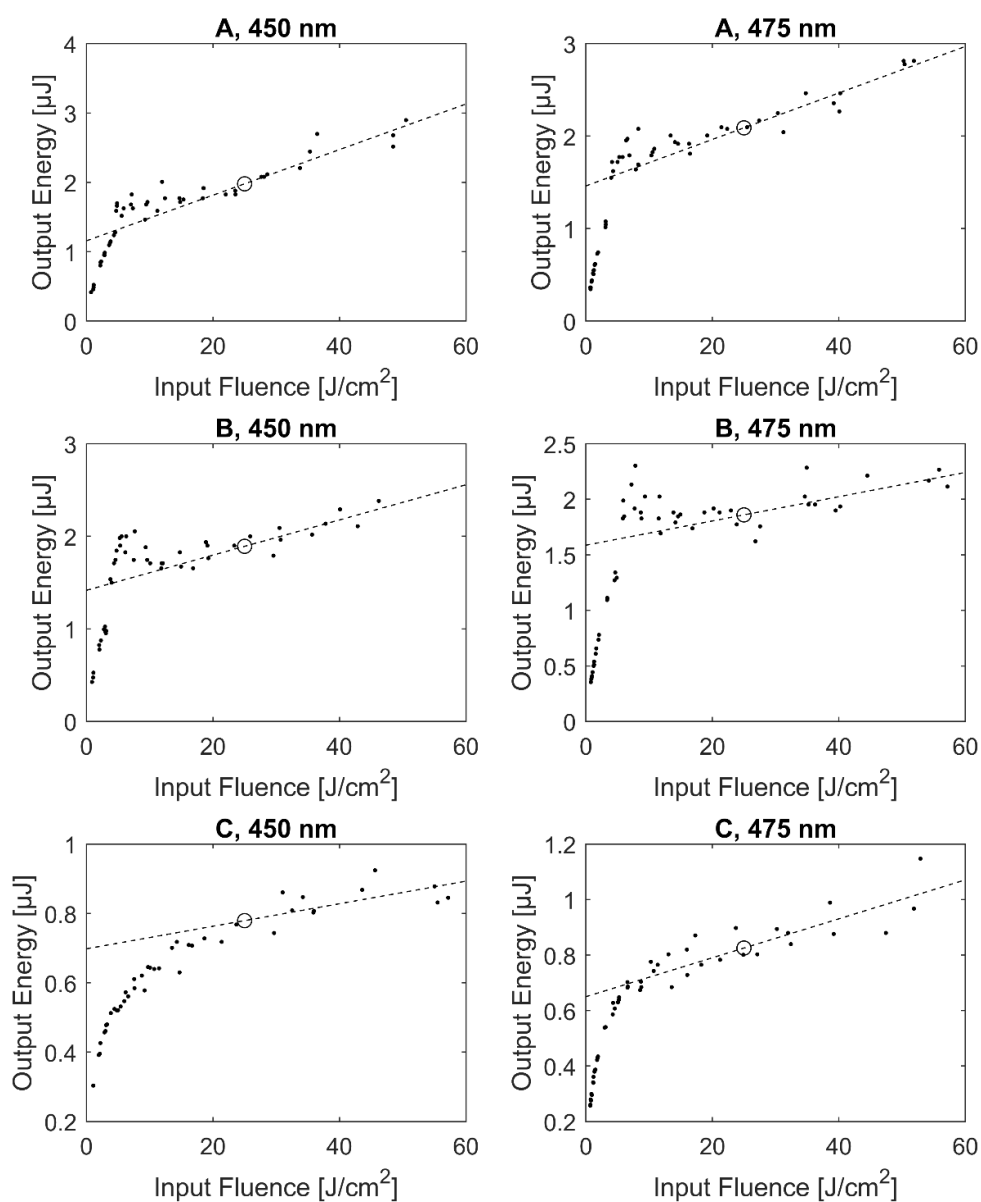

**Figure S1.** OPL curves for molecule "A", "B" and "C" at 450 and 475 nm. The dashed lines are linear fits for the data points above 20  $\text{J}/\text{cm}^2$ . The circles the values used in Figure 4.

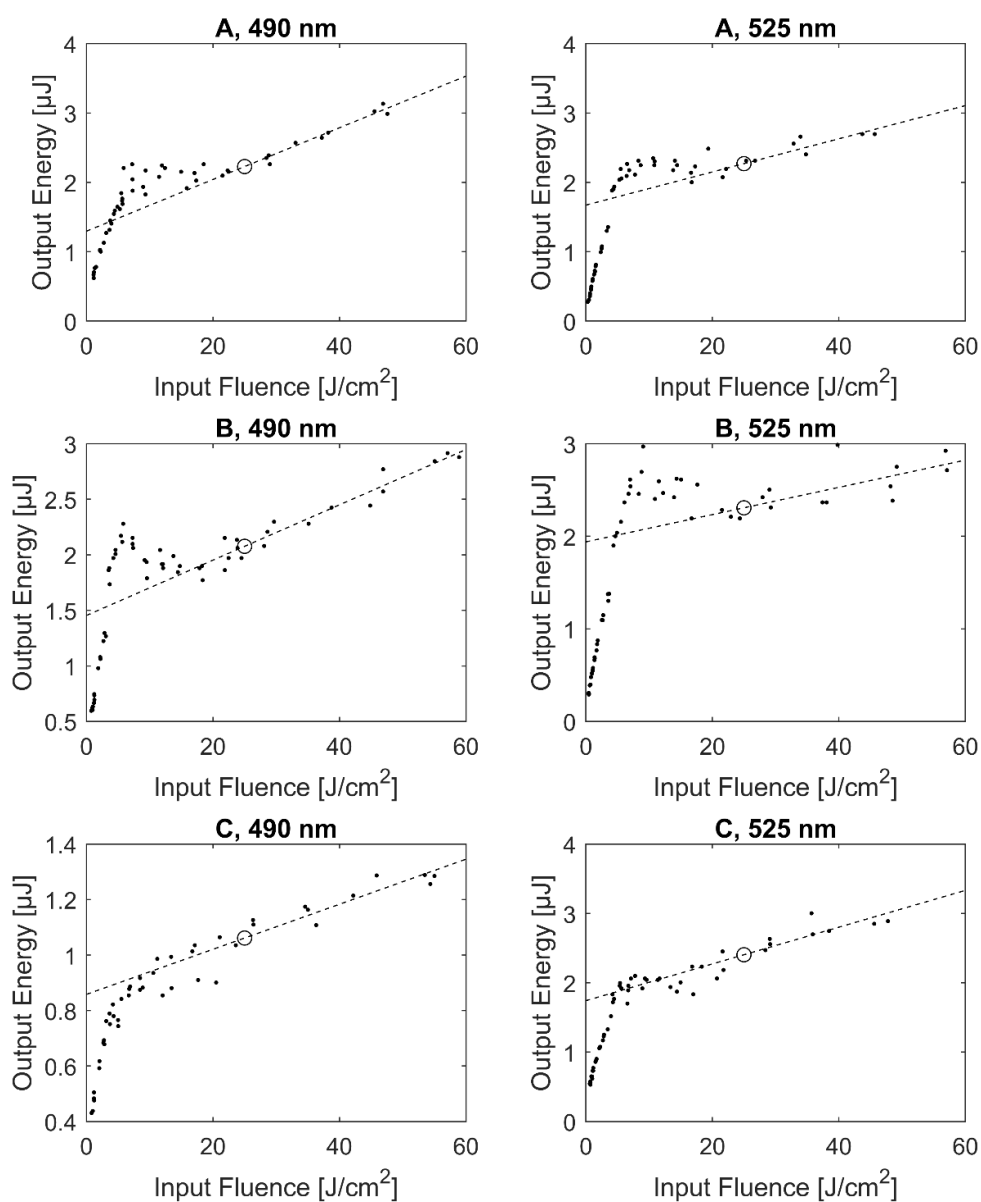

**Figure S2.** OPL curves for molecule “A”, “B” and “C” at 490 and 525 nm. The dashed lines are linear fits for the data points above 20 J/cm<sup>2</sup>. The circles the values used in Figure 4.

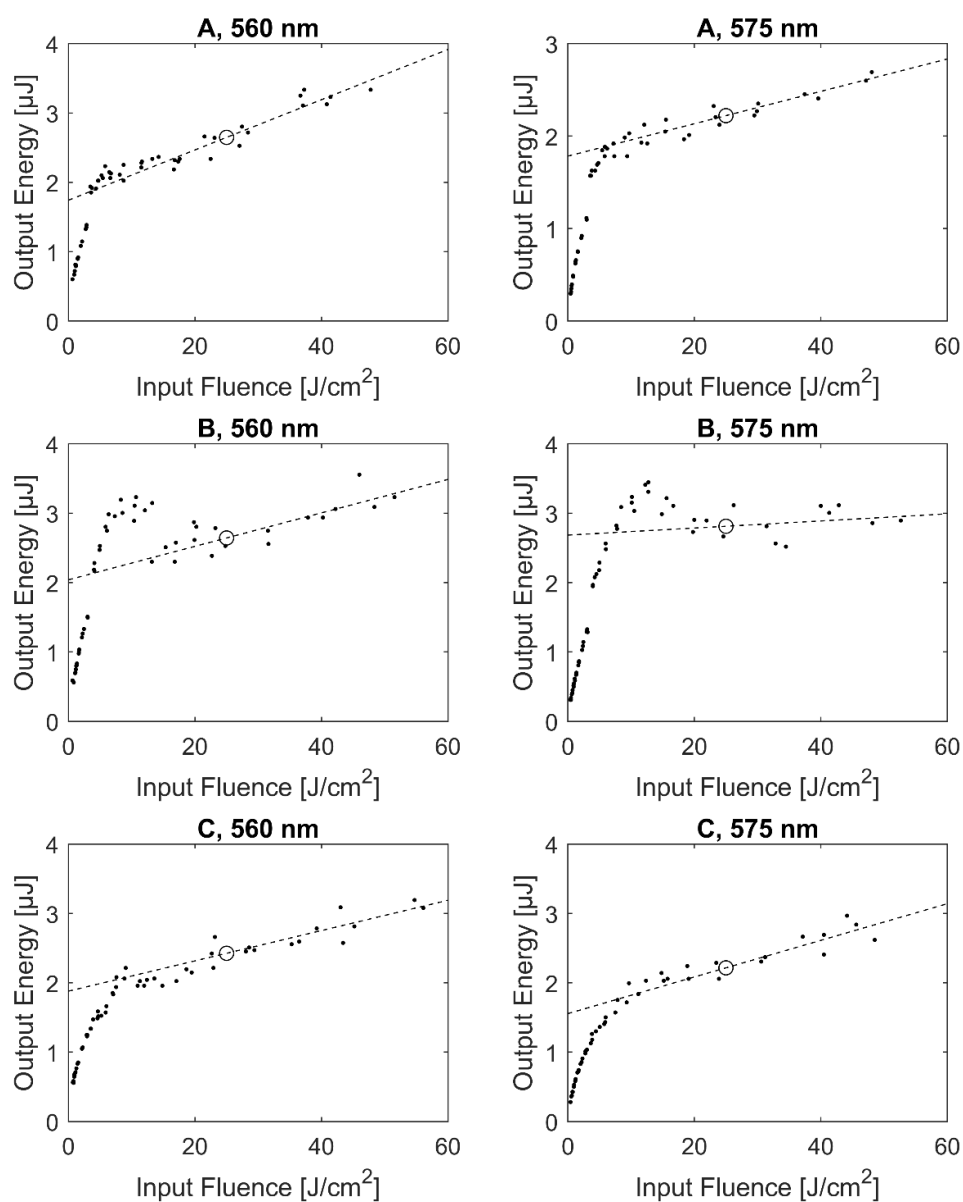

**Figure S3.** OPL curves for molecule "A", "B" and "C" at 560 and 575 nm. The dashed lines are linear fits for the data points above 20 J/cm<sup>2</sup>. The circles the values used in Figure 4.

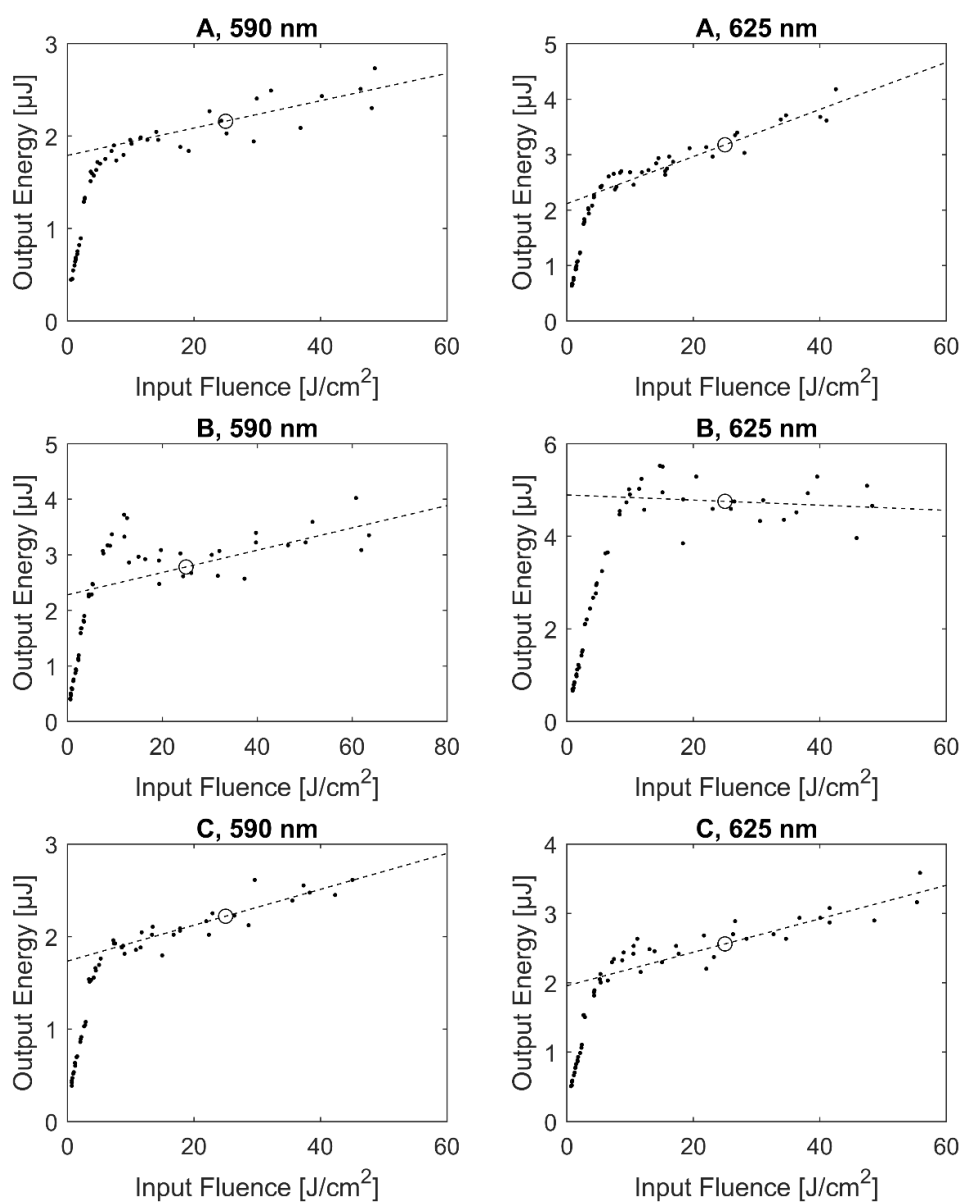

**Figure S4.** OPL curves for molecule “A”, “B” and “C” at 590 and 625 nm. The dashed lines are linear fits for the data points above 20 J/cm<sup>2</sup>. The circles the values used in Figure 4.

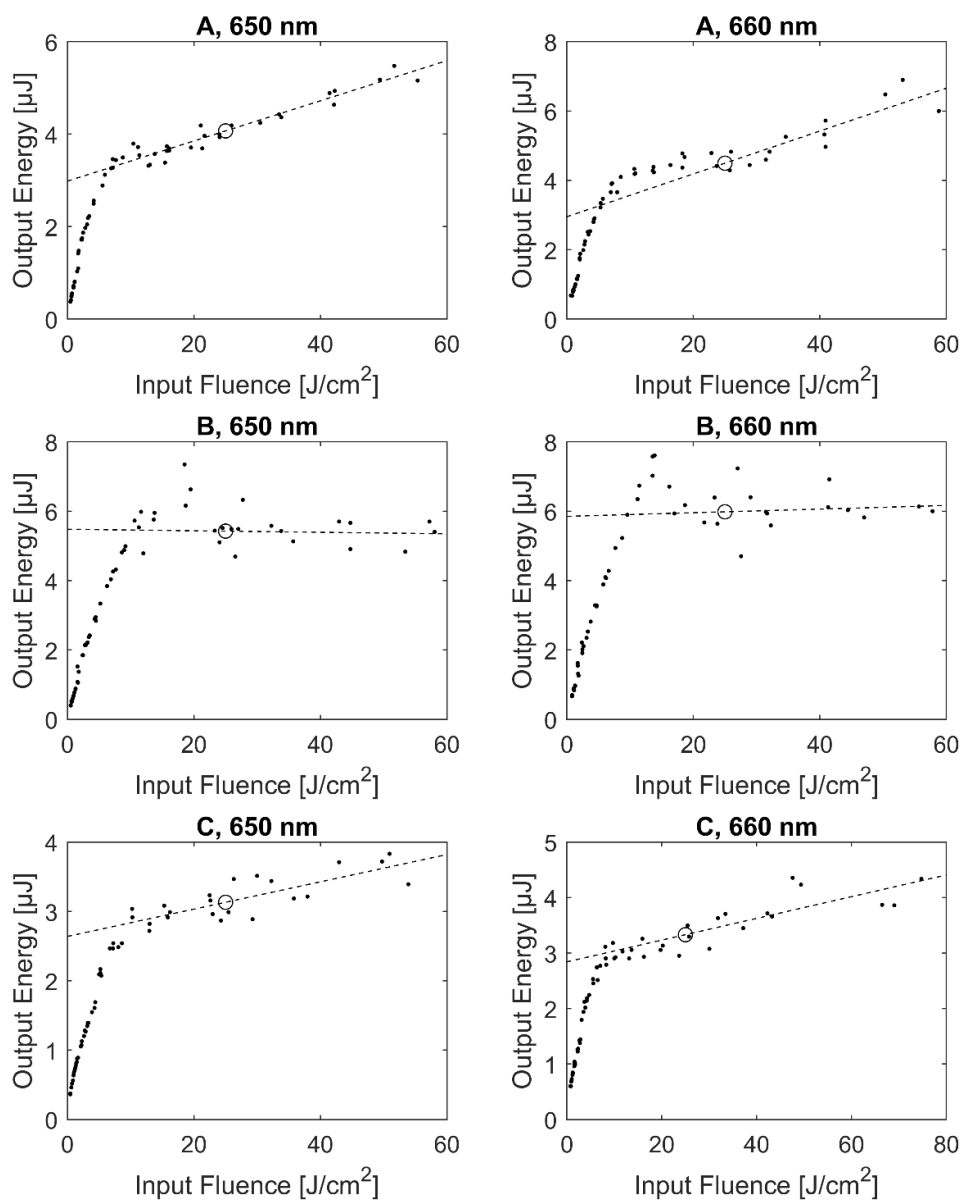

**Figure S5.** OPL curves for molecule "A", "B" and "C" at 650 and 660 nm. The dashed lines are linear fits for the data points above 20 J/cm<sup>2</sup>. The circles the values used in Figure 4.

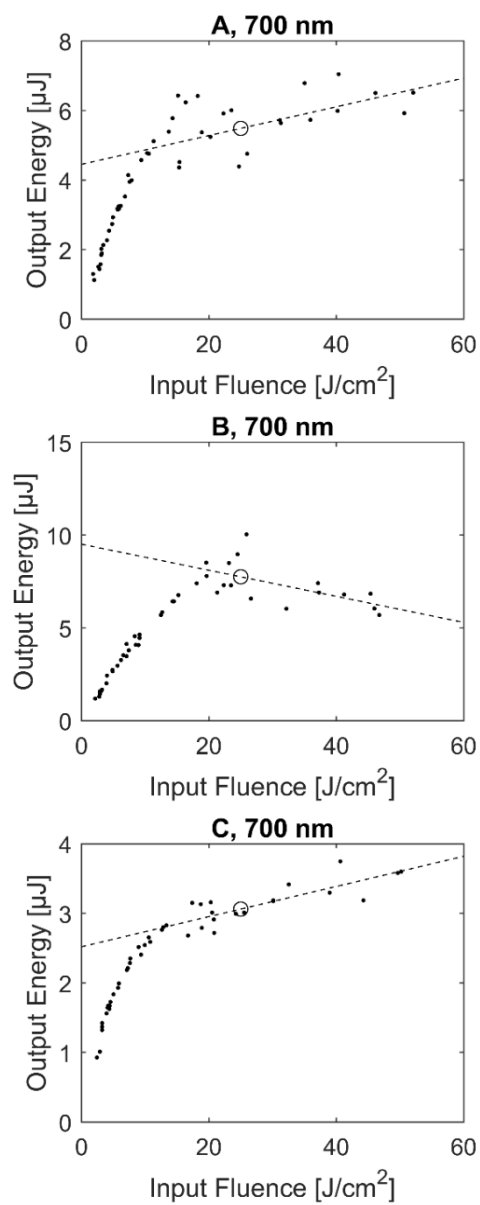

**Figure S6.** OPL curves for molecule “A”, “B” and “C” at 700 nm. The dashed lines are linear fits for the data points above 20  $\text{J}/\text{cm}^2$ . The circles the values used in Figure 4.

## Ultra-Fast Transient Absorption Measurements

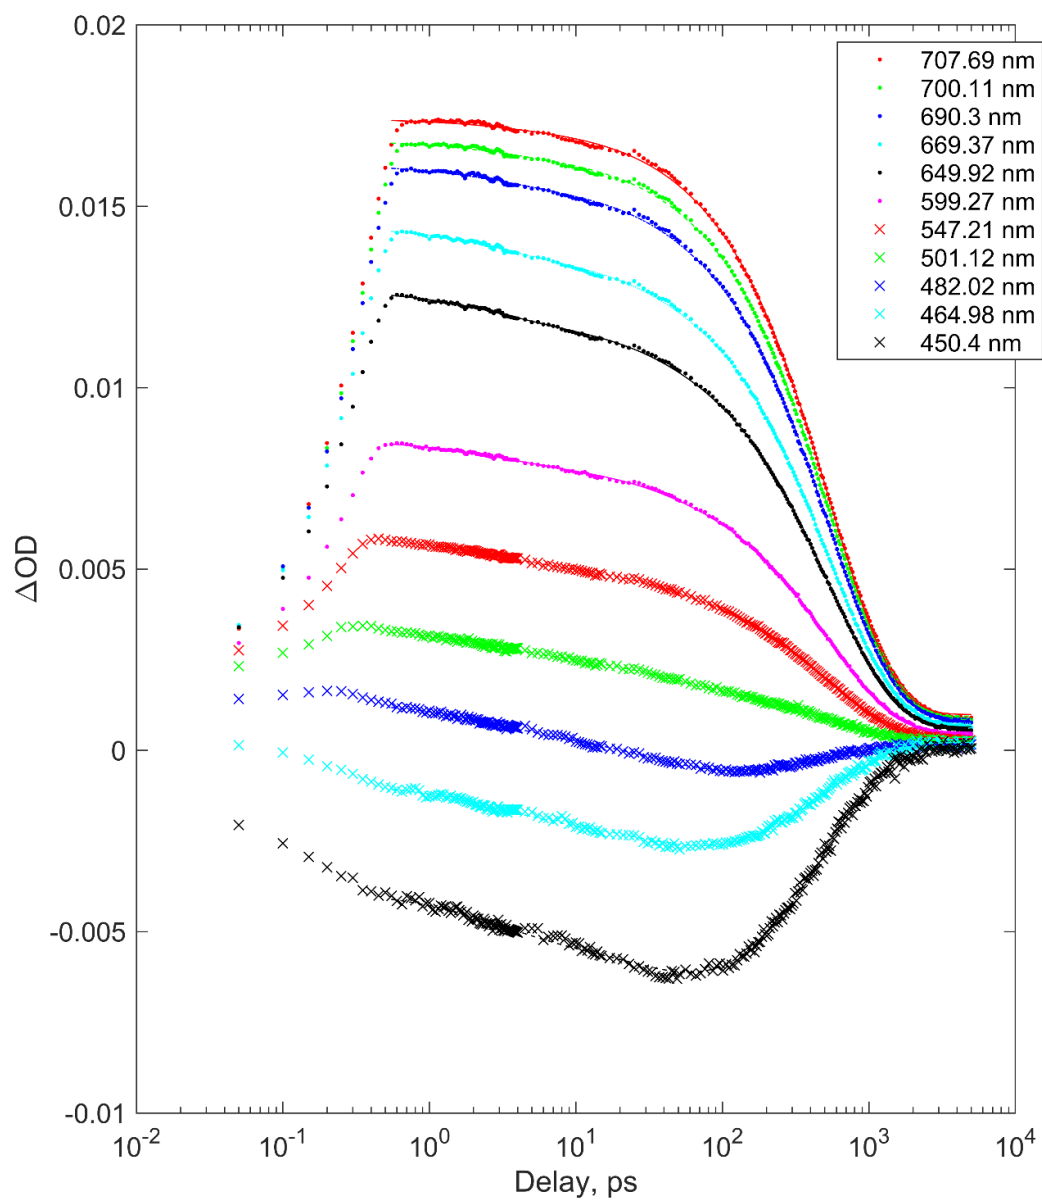

Figure S7. Transient absorption spectrum and fits for molecule "A" at selected wavelengths.



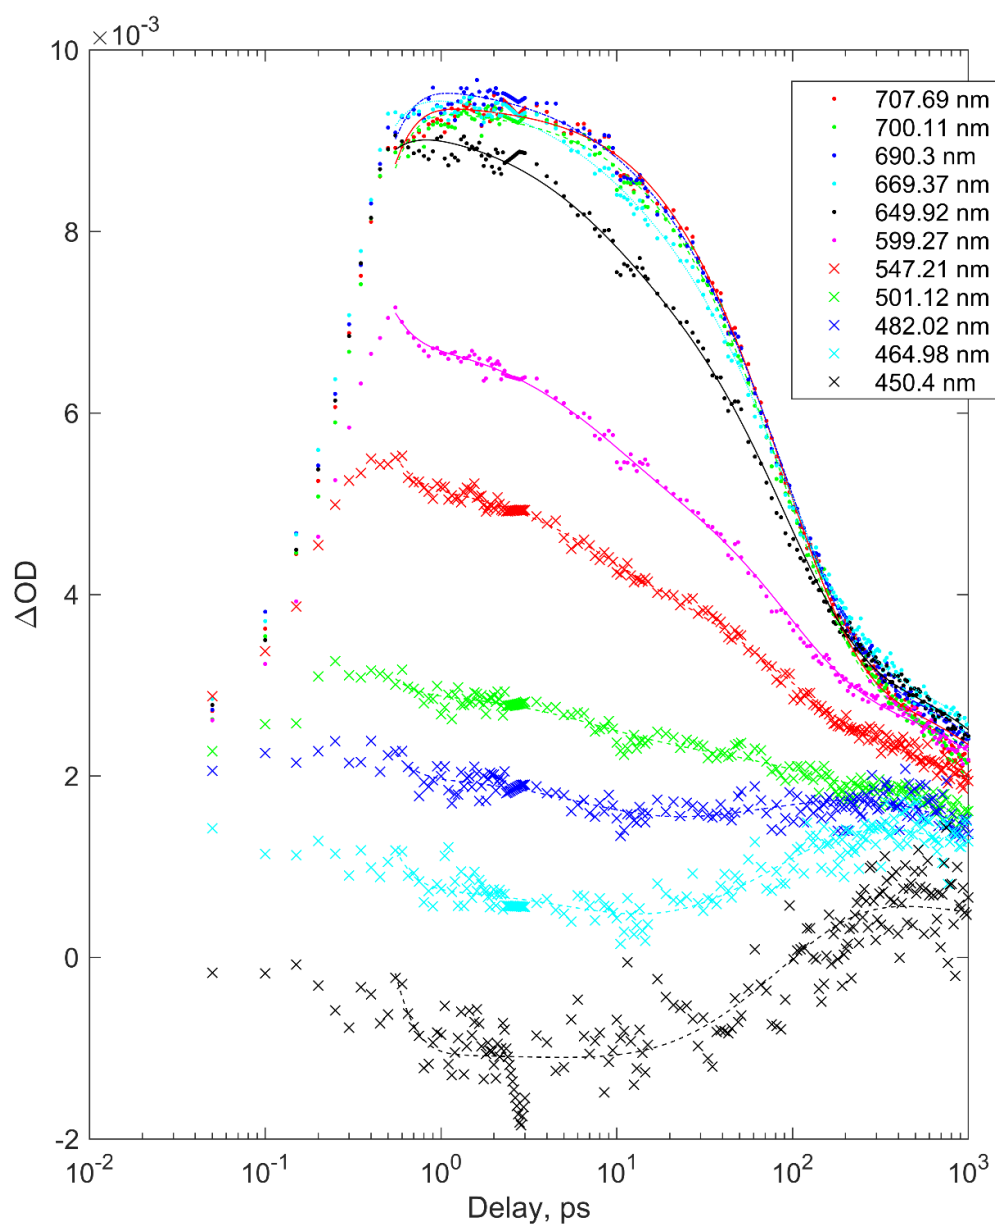

**Figure S8.** Transient absorption spectrum and fits for molecule "B" at selected wavelengths.

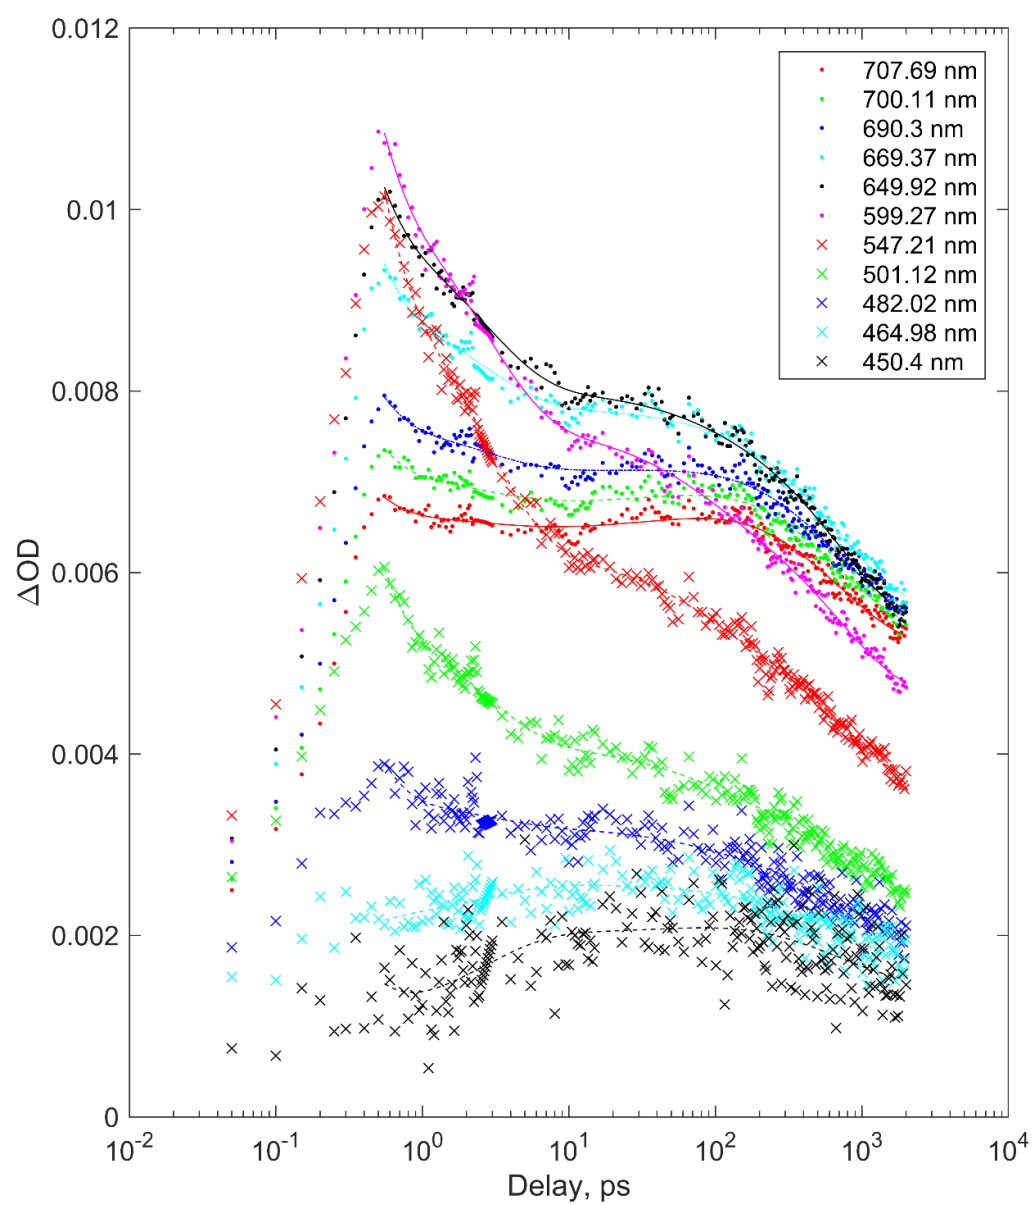

**Figure S9.** Transient absorption spectrum and fits for molecule "C" at selected wavelengths.
